# Supplementary material for: The comparative biogeography of Philippine geckos challenges predictions from a paradigm of climate‐driven vicariant diversification across an island archipelago
Source: PubMed Central journal article supplement (PMC6767427; doi:10.1111/evo.13754), 2019-05-09

# The comparative biogeography of Philippine geckos challenges predictions from a paradigm of climate-driven vicariant diversification across an island archipelago

Jamie R. Oaks<sup>1</sup>   Cameron D. Siler<sup>2</sup>   Rafe M. Brown<sup>3</sup>

<sup>1</sup>Department of Biological Sciences & Museum of Natural History, Auburn University, Auburn, Alabama 36849, USA

<sup>2</sup>Sam Noble Oklahoma Museum of Natural History and Department of Biology, University of Oklahoma, Norman, Oklahoma 73072-7029

<sup>3</sup>Biodiversity Institute and Department of Ecology and Evolutionary Biology, University of Kansas, Lawrence, Kansas 66045, USA

May 3, 2019

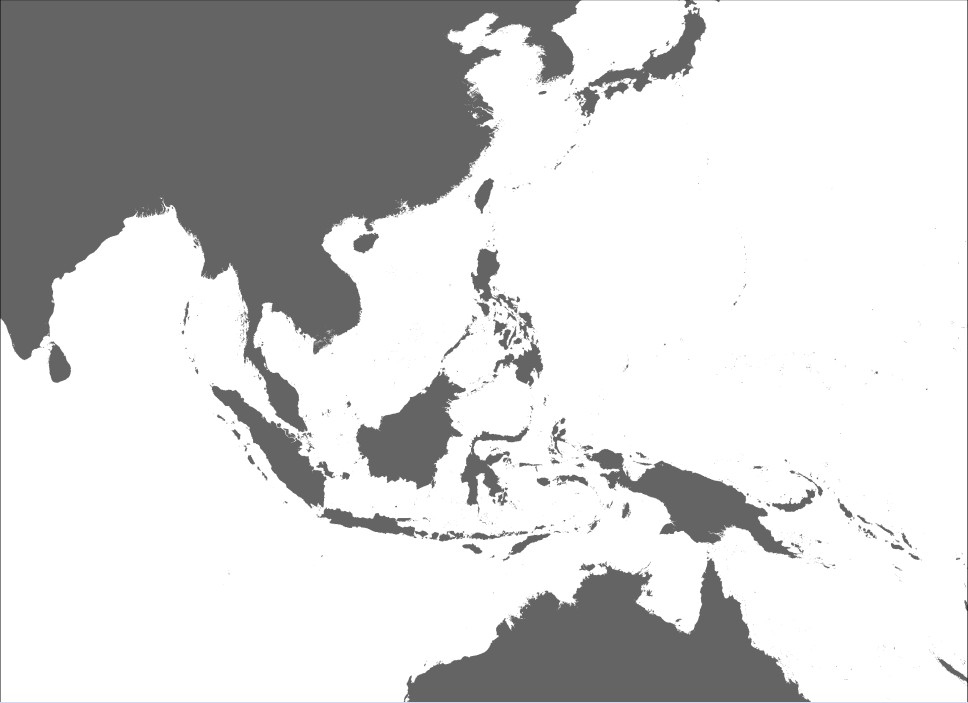

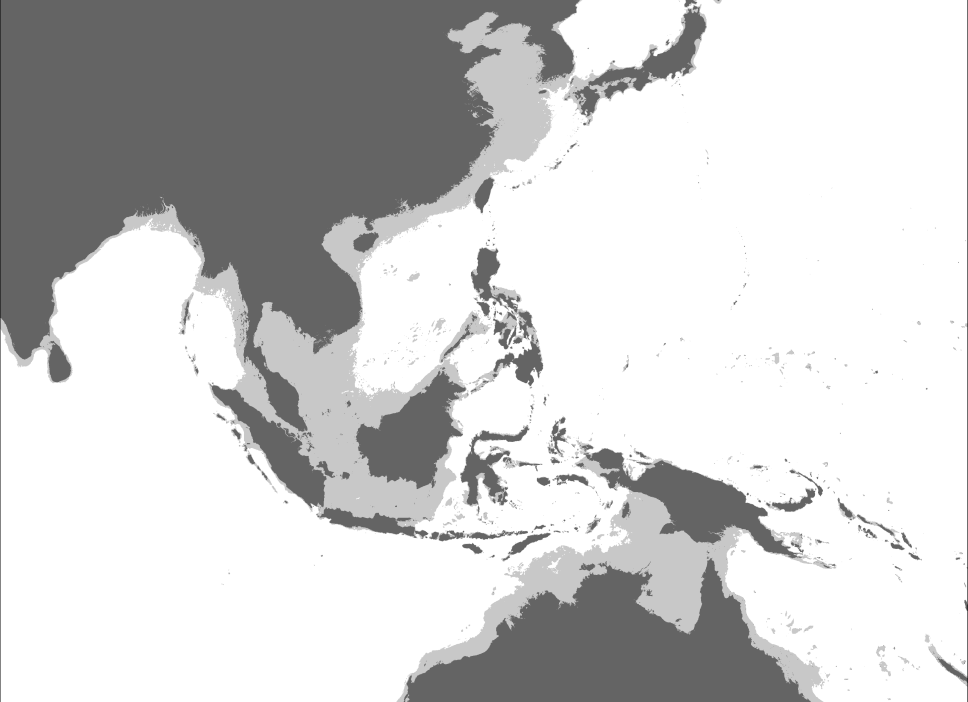

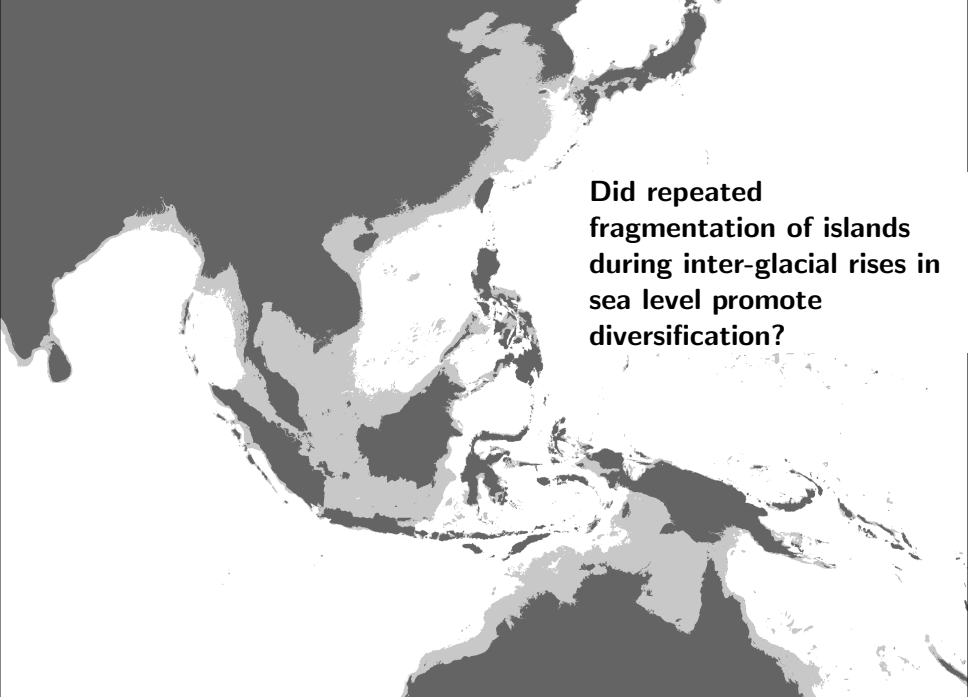

**Did repeated  
fragmentation of islands  
during inter-glacial rises in  
sea level promote  
diversification?**

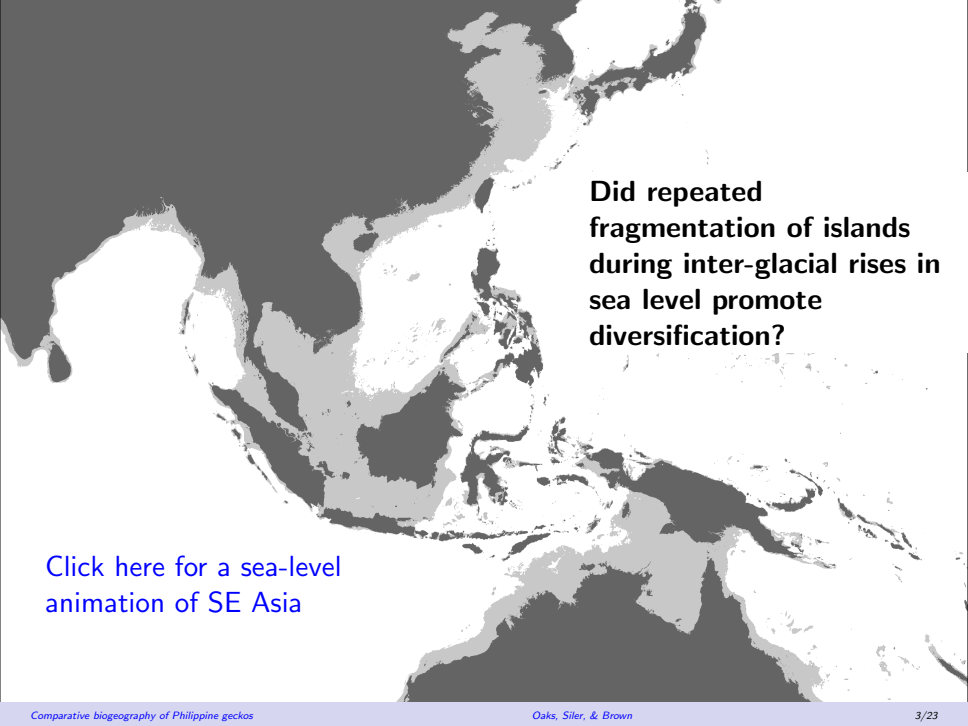

**Did repeated  
fragmentation of islands  
during inter-glacial rises in  
sea level promote  
diversification?**

[Click here for a sea-level  
animation of SE Asia](#)

“Species-pump” Hypothesis Repeated climate-driven fragmentation of the Philippine Islands was a primary mechanism of speciation for terrestrial fauna

“Species-pump” Hypothesis Repeated climate-driven fragmentation of the Philippine Islands was a primary mechanism of speciation for terrestrial fauna

**Prediction** Taxa co-distributed across islands within the same Pleistocene aggregate island complex (PAIC) will have divergence times that tend to be clustered around times when sea levels fragmented the islands

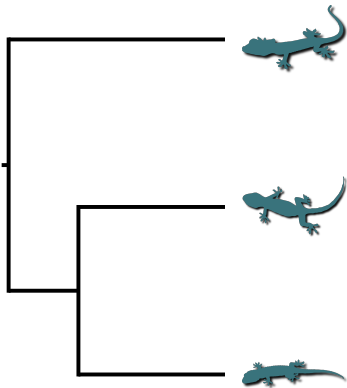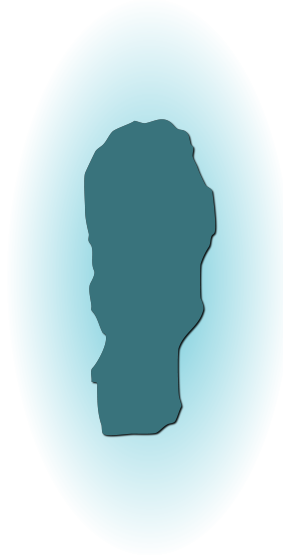



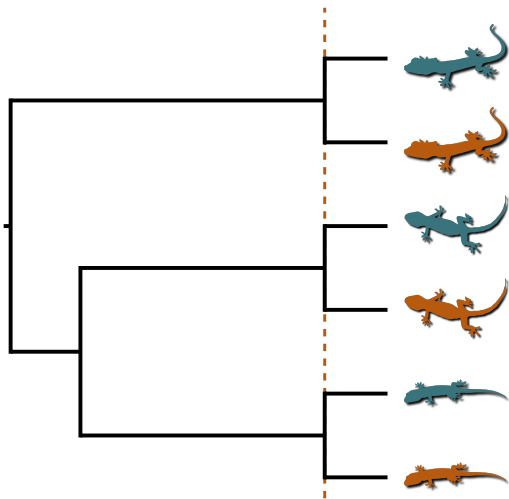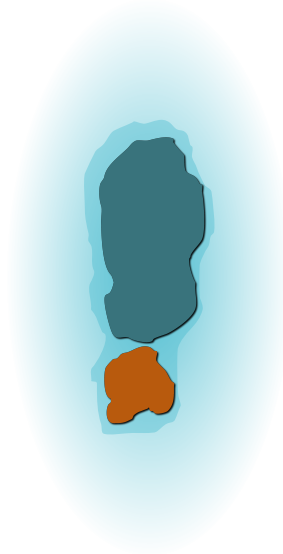

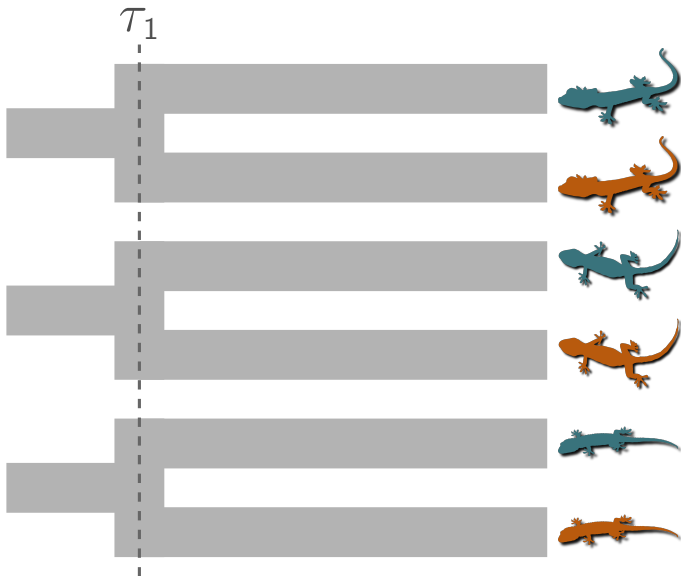

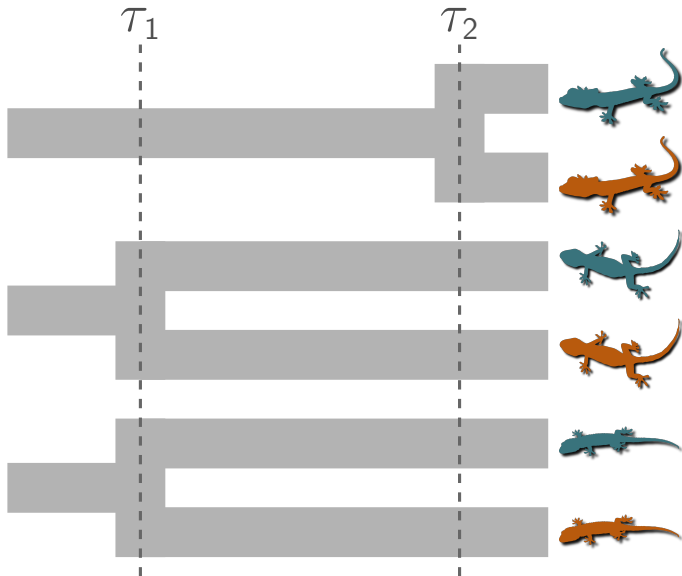

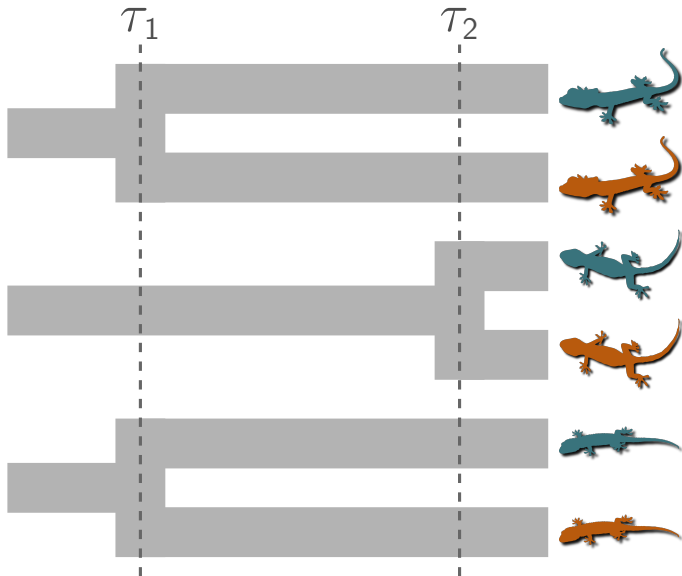

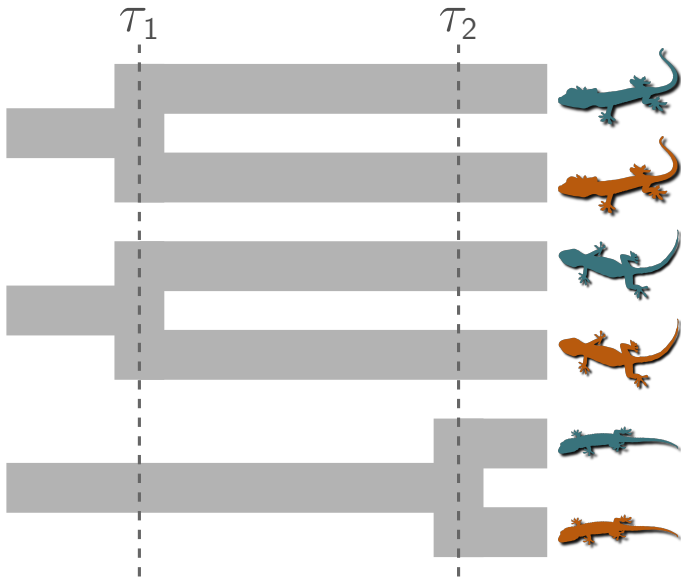

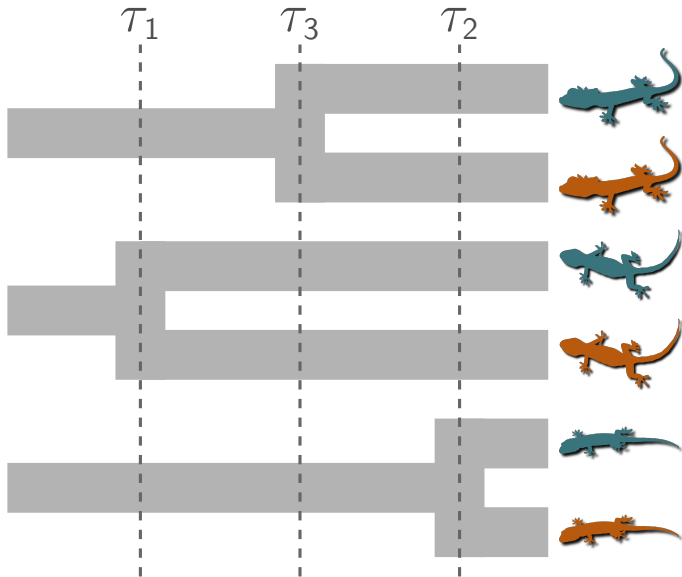

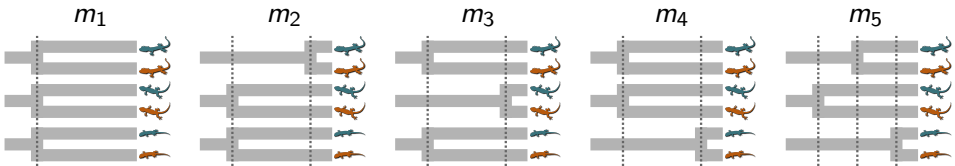

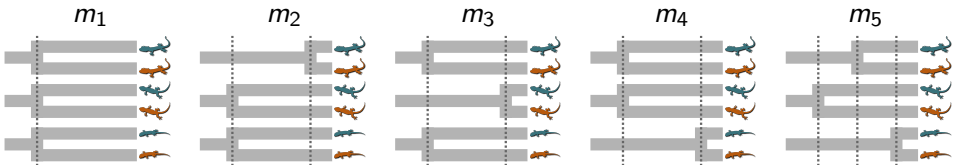

We want to infer the model and divergence times given genetic data



## Previous tests of “species-pump”

- ▶ Oaks et al. (2013)<sup>1</sup> collected mitochondrial DNA sequences from 22 pairs of populations (including bats, shrews, skinks, geckos, snakes, and frogs)

---

<sup>1</sup> J. R. Oaks et al. (2013). *Evolution* 67: 991–1010. <sup>2</sup> W. Huang et al. (2011). *BMC Bioinformatics* 12: 1.

## Previous tests of “species-pump”

- ▶ Oaks et al. (2013)<sup>1</sup> collected mitochondrial DNA sequences from 22 pairs of populations (including bats, shrews, skinks, geckos, snakes, and frogs)
  - ▶ Analyzed these data with ABC method msBayes<sup>2</sup>

---

<sup>1</sup> J. R. Oaks et al. (2013). *Evolution* 67: 991–1010. <sup>2</sup> W. Huang et al. (2011). *BMC Bioinformatics* 12: 1.

# Previous tests of “species-pump”

- ▶ Oaks et al. (2013)<sup>1</sup> collected mitochondrial DNA sequences from 22 pairs of populations (including bats, shrews, skinks, geckos, snakes, and frogs)
  - ▶ Analyzed these data with ABC method `msBayes`<sup>2</sup>
  - ▶ Found strong support for shared divergences across taxa (results below for 9 pairs from islands of Negros and Panay)

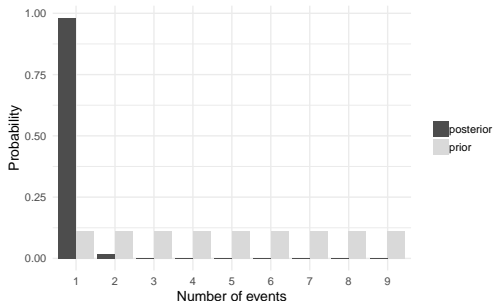

<sup>1</sup> J. R. Oaks et al. (2013). *Evolution* 67: 991–1010. <sup>2</sup> W. Huang et al. (2011). *BMC Bioinformatics* 12: 1.

# Previous tests of “species-pump”

- ▶ Oaks et al. (2013)<sup>1</sup> collected mitochondrial DNA sequences from 22 pairs of populations (including bats, shrews, skinks, geckos, snakes, and frogs)
  - ▶ Analyzed these data with ABC method `msBayes`<sup>2</sup>
  - ▶ Found strong support for shared divergences across taxa (results below for 9 pairs from islands of Negros and Panay)
  - ▶ But, method was very sensitive to prior assumptions and often biased toward estimating co-divergences



<sup>1</sup> J. R. Oaks et al. (2013). *Evolution* 67: 991–1010. <sup>2</sup> W. Huang et al. (2011). *BMC Bioinformatics* 12: 1.

## Previous tests of “species-pump”

- ▶ Oaks (2014)<sup>1</sup> reanalyzed the data from Oaks et al. (2013)<sup>2</sup> with a modified ABC method `dpp-msbayes`

---

<sup>1</sup> J. R. Oaks (2014). *BMC Evolutionary Biology* 14: 150. <sup>2</sup> J. R. Oaks et al. (2013). *Evolution* 67: 991–1010.

# Previous tests of “species-pump”

- ▶ Oaks (2014)<sup>1</sup> reanalyzed the data from Oaks et al. (2013)<sup>2</sup> with a modified ABC method `dpp-msbayes`
  - ▶ New method was less biased, but little information in summary statistics to inform divergence times

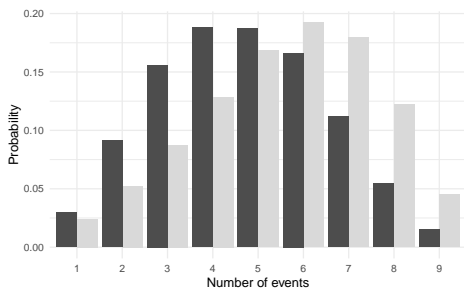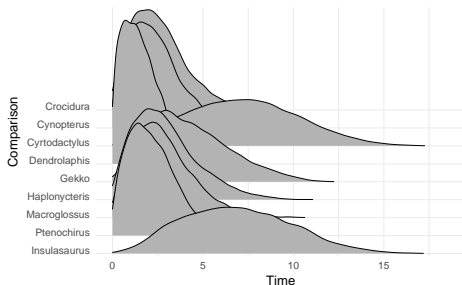

<sup>1</sup> J. R. Oaks (2014). *BMC Evolutionary Biology* 14: 150. <sup>2</sup> J. R. Oaks et al. (2013). *Evolution* 67: 991–1010.

# Previous tests of “species-pump”

- ▶ Oaks (2014)<sup>1</sup> reanalyzed the data from Oaks et al. (2013)<sup>2</sup> with a modified ABC method `dpp-msbayes`
  - ▶ New method was less biased, but little information in summary statistics to inform divergence times

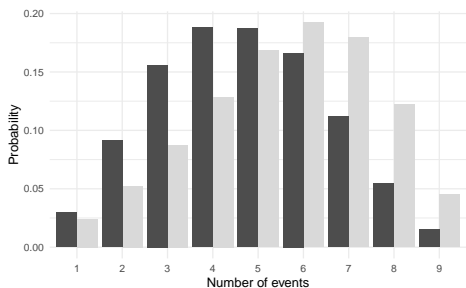

What now? We need **more data** and/or an **improved method** that better utilizes the information in those data.

<sup>1</sup> J. R. Oaks (2014). *BMC Evolutionary Biology* 14: 150. <sup>2</sup> J. R. Oaks et al. (2013). *Evolution* 67: 991–1010.

# Previous tests of “species-pump”

- ▶ Oaks (2014)<sup>1</sup> reanalyzed the data from Oaks et al. (2013)<sup>2</sup> with a modified ABC method `dpp-msbayes`
  - ▶ New method was less biased, but little information in summary statistics to inform divergence times



What now? We need **more data** and/or an **improved method** that better utilizes the information in those data. **Our goal is to do both.**

<sup>1</sup> J. R. Oaks (2014). *BMC Evolutionary Biology* 14: 150. <sup>2</sup> J. R. Oaks et al. (2013). *Evolution* 67: 991–1010.



# *Cyrtodactylus* (Gekkonidae)

- ▶ 265+ species across Asia
- ▶ 10+ species across Philippines
- ▶ Nocturnal, scansorial lizards that eat terrestrial invertebrates
- ▶ Specialized bent toes for climbing

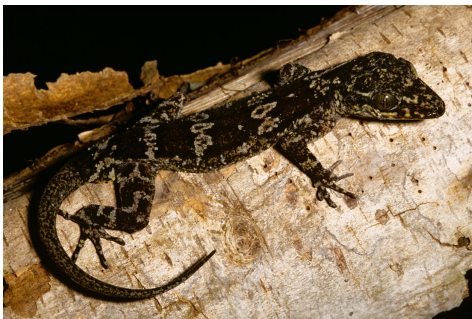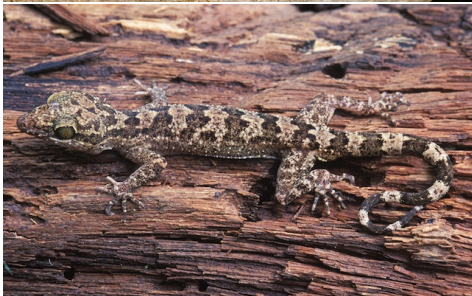

# Gekko (Gekkonidae)

- ▶ 60+ species across Southeast Asia
- ▶ 14+ species across Philippines
- ▶ Nocturnal, scansorial lizards that eat terrestrial invertebrates
- ▶ Subdigital lamellae for climbing

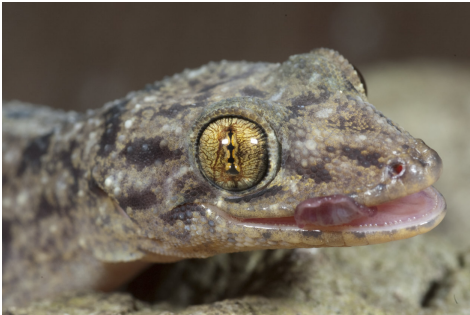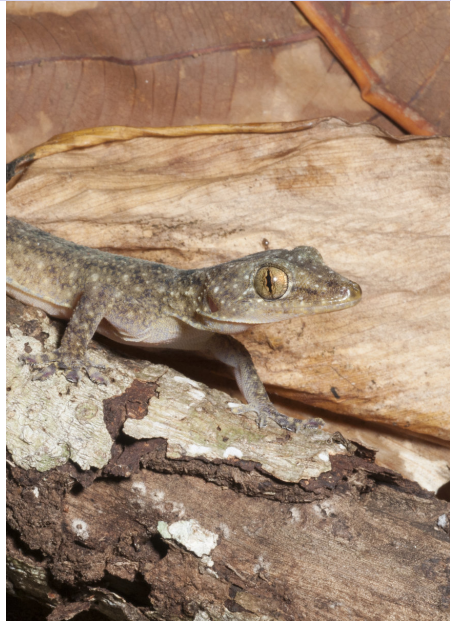

# Methods

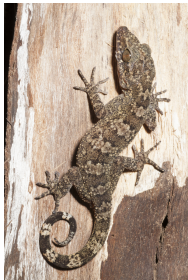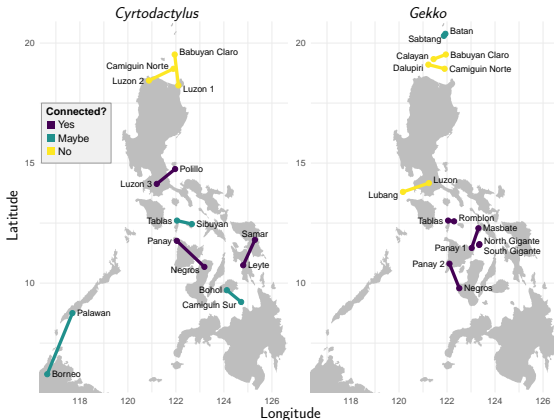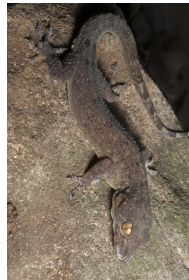

- ▶ Sampled individuals from 8 pairs of populations for both *Cyrtodactylus* and *Gekko*
  - ▶ Sampled 2–5 individuals per population
- ▶ Collected genome-wide DNA sequence data from each individual
  - ▶ Restriction-site-associated DNA sequencing (RADseq)

Analyzed RADseq data with full-likelihood Bayesian comparative phylogeographic method:

**Ecoevolity: Estimating evolutionary coevality**

Analyzed RADseq data with full-likelihood Bayesian comparative phylogeographic method:

## Ecoevolity: Estimating evolutionary coevality

- ▶ Used simulations to assess how well ecoevolity works given the gekkonid RADseq data sets

# Results: *Cyrtodactylus* (Figure 2)

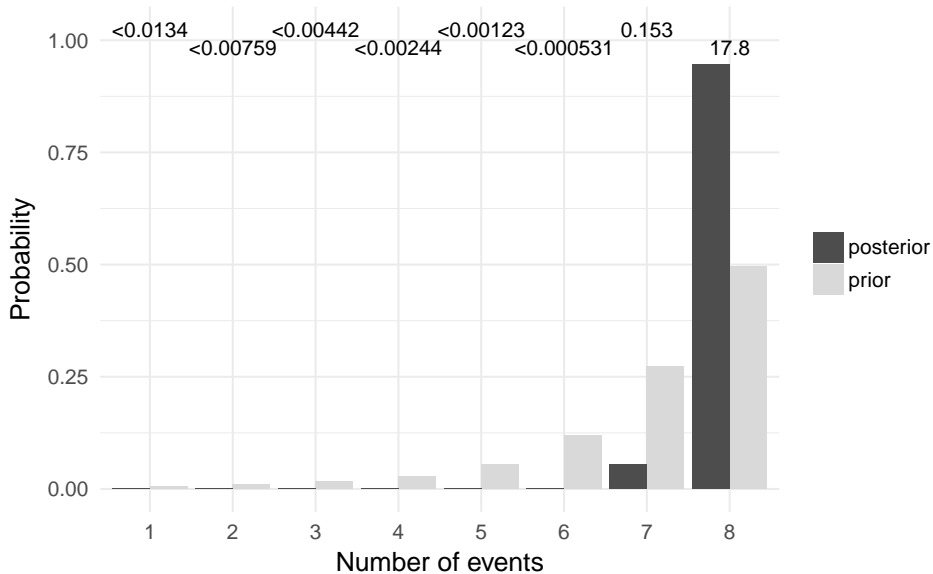

# Results: *Cyrtodactylus* (Figure 3)

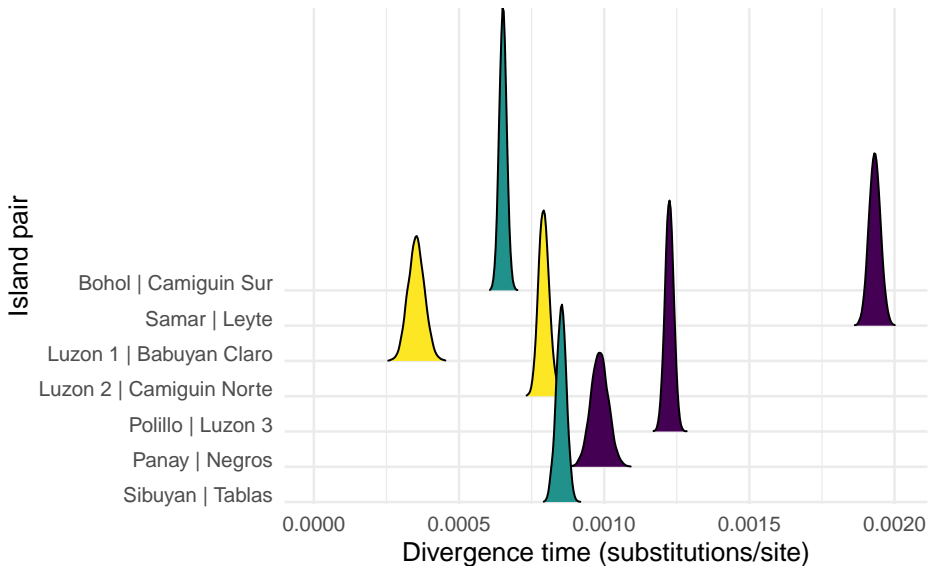

# Results: *Gekko* (Figure 4)

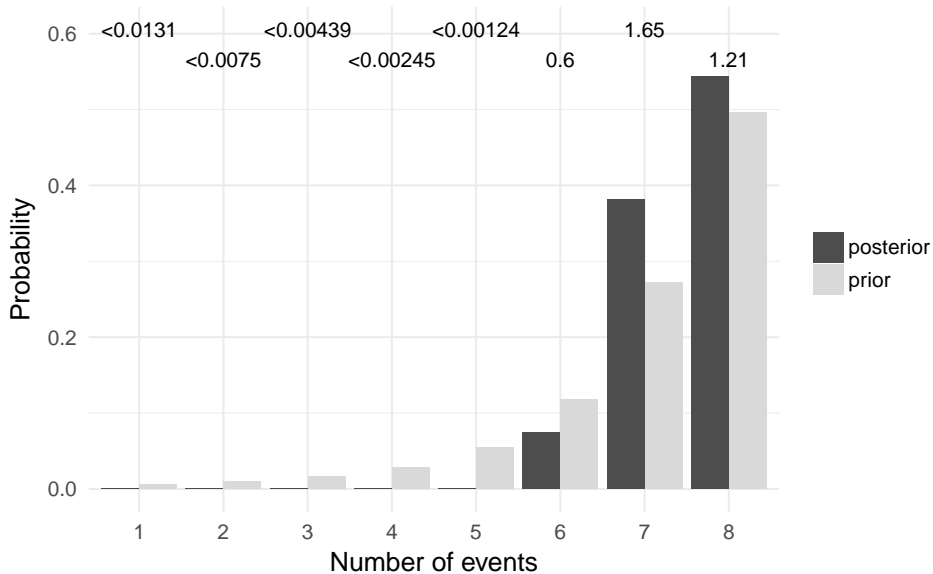



# Results: *Gekko* (Figure 5)

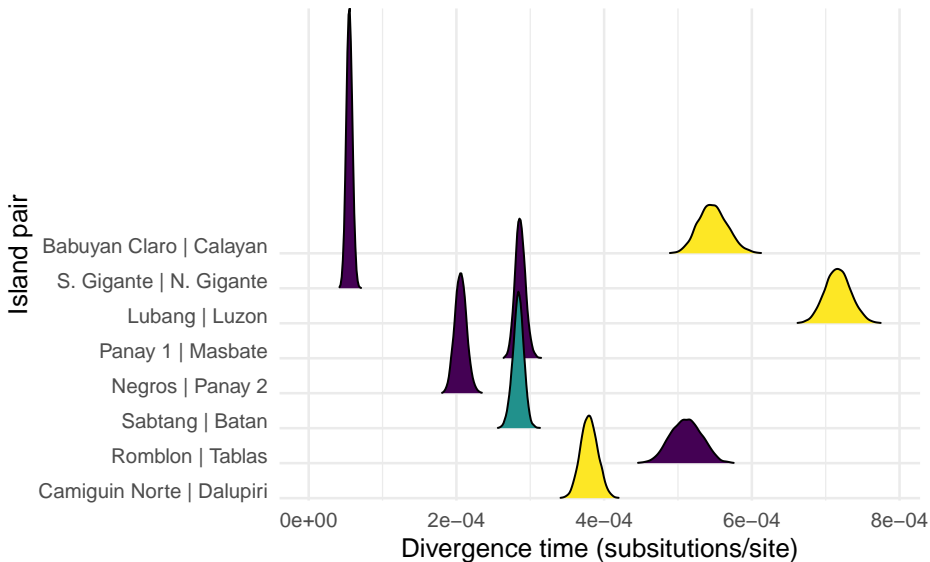

# Key findings

- ▶ Strong support that all 8 pairs of *Cyrtodactylus* populations diverged independently

# Key findings

- ▶ Strong support that all 8 pairs of *Cyrtodactylus* populations diverged independently
- ▶ Weak support that all 8 pairs of *Gekko* populations diverged independently

# Key findings

- ▶ Strong support that all 8 pairs of *Cyrtodactylus* populations diverged independently
- ▶ Weak support that all 8 pairs of *Gekko* populations diverged independently
- ▶ Simulation results suggest *ecoevolity* can accurately estimate the timing and number of divergences given the gekkonid RADseq data

# Caveats

- ▶ Too few island pairs to rule out climate-driven vicariant speciation
- ▶ Differences in divergence times could be due to variation in fragmentation times among island pairs
- ▶ Differences in divergence could also be due to variation in mutation rates

# Caveats

- ▶ Too few island pairs to rule out climate-driven vicariant speciation
- ▶ Differences in divergence times could be due to variation in fragmentation times among island pairs
- ▶ Differences in divergence could also be due to variation in mutation rates
  
- ▶ Seems safe to conclude that the “species-pump” is not the rule for gekkonids, but maybe the exception

# Take home points

- ▶ Support against the “species-pump” hypothesis

# Take home points

- ▶ Support against the “species-pump” hypothesis
- ▶ Results suggest repeated cycles of climate-driven island fragmentation were not an important mechanism of speciation for gekkonid lizards in the Philippines



# Take home points

- ▶ Support against the “species-pump” hypothesis
- ▶ Results suggest repeated cycles of climate-driven island fragmentation were not an important mechanism of speciation for gekkonid lizards in the Philippines
- ▶ Rare over-water dispersal via rafting on vegetation is likely an important mechanism responsible for the distribution of gekkonid lizards in the Philippines

# Everything is on GitHub...

## Software:

- ▶ Ecoevolity: <https://github.com/phyletica/ecoevolity>

## Open-Science Notebook:

- ▶ Gecko RADseq: <https://github.com/phyletica/gekgo>

# Acknowledgments

## Ideas and feedback:

- ▶ Phyletica Lab (the Phyleticians)
- ▶ Constructive feedback from Editor-in-Chief Mohamed Noor, Associate Editor David Weisrock, and four anonymous reviewers greatly improved this work

## Lab work:

- ▶ Patrick Monnahan and John Kelly for their help with the MSG libraries

## Computation:

- ▶ Alabama Supercomputer Authority
- ▶ Auburn University Hopper Cluster

## Funding:

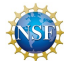

## Photo credits:

- ▶ Rafe Brown and Cam Siler
- ▶ [PhyloPic!](#)

# Questions?

joaks@auburn.edu

phyletica.org

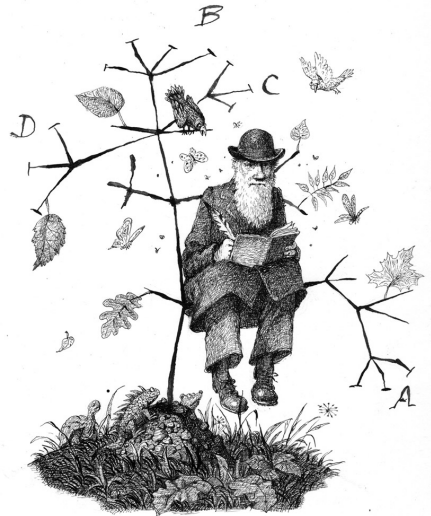

© 2007 Boris Kulikov [boris-kulikov.blogspot.com](http://boris-kulikov.blogspot.com)

Figure 6

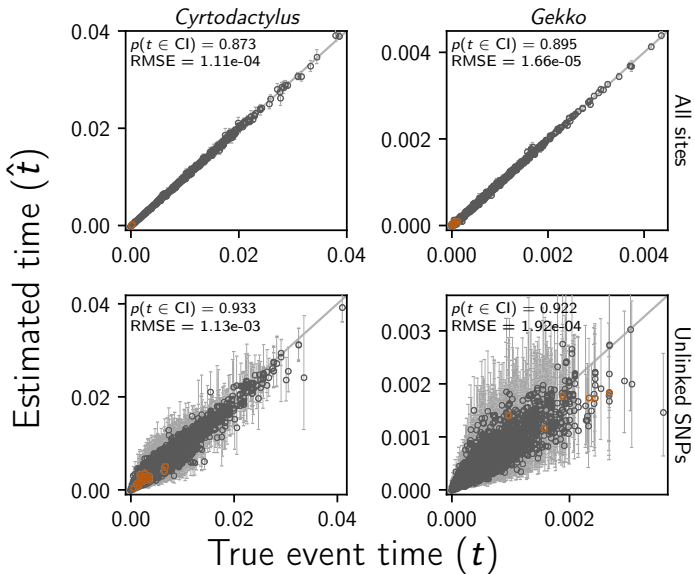

Figure 7

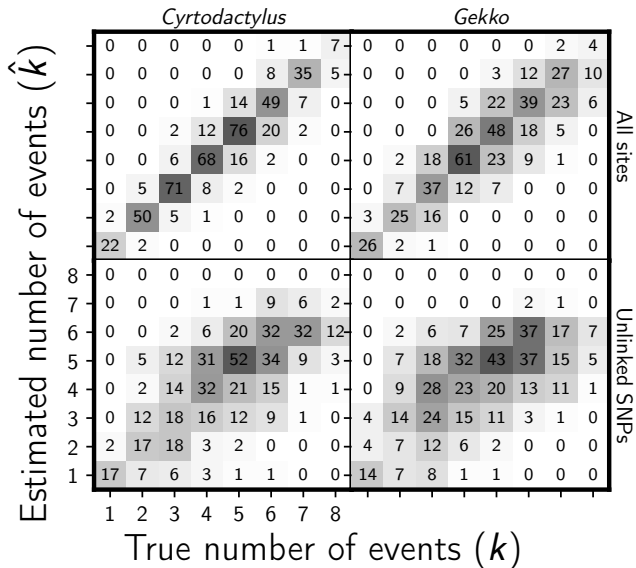

# Figure S1

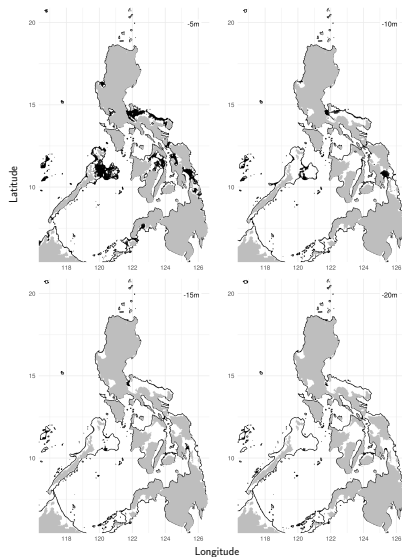

# Figure S2

[Click here for a sea-level animation of SE Asia](#)



# Figure S3

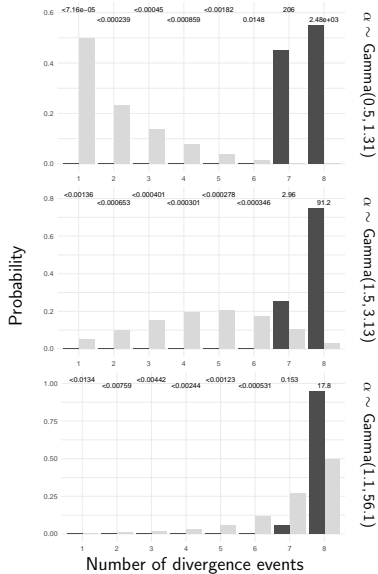

# Figure S4

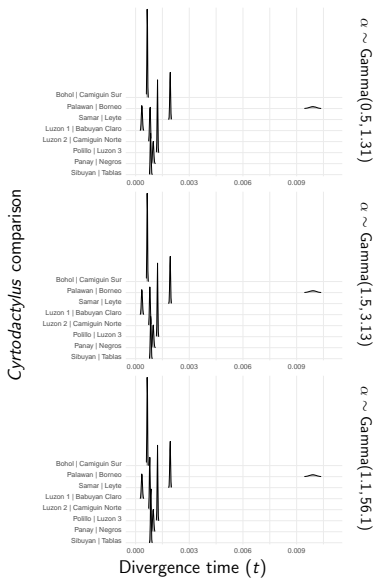

# Figure S5

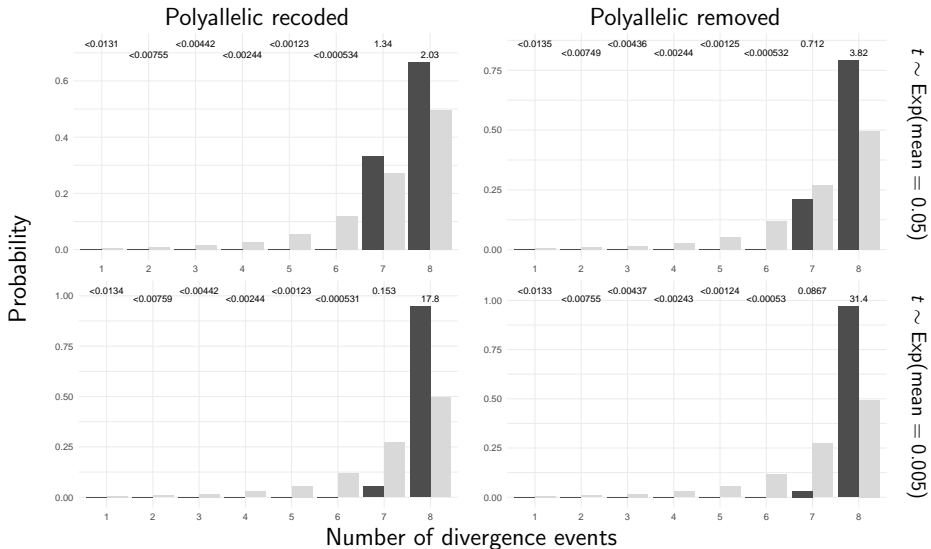

# Figure S6

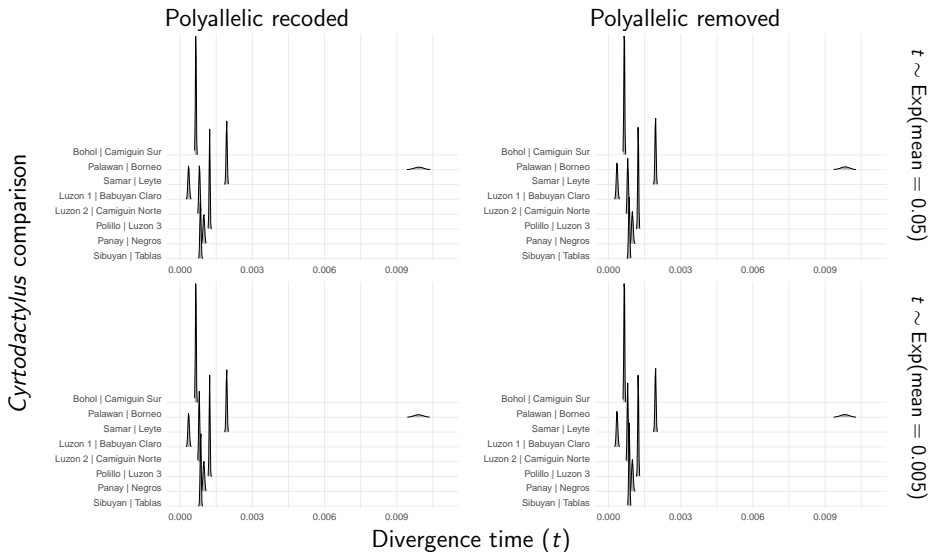

# Figure S7

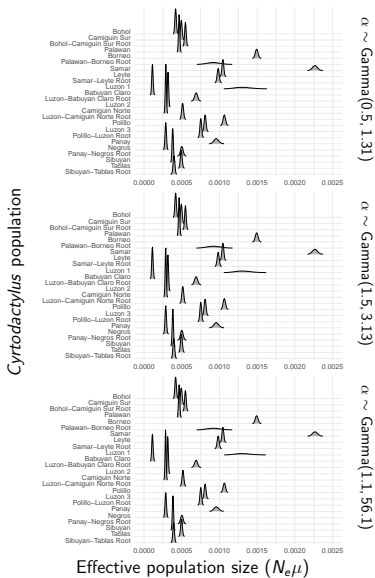

# Figure S8

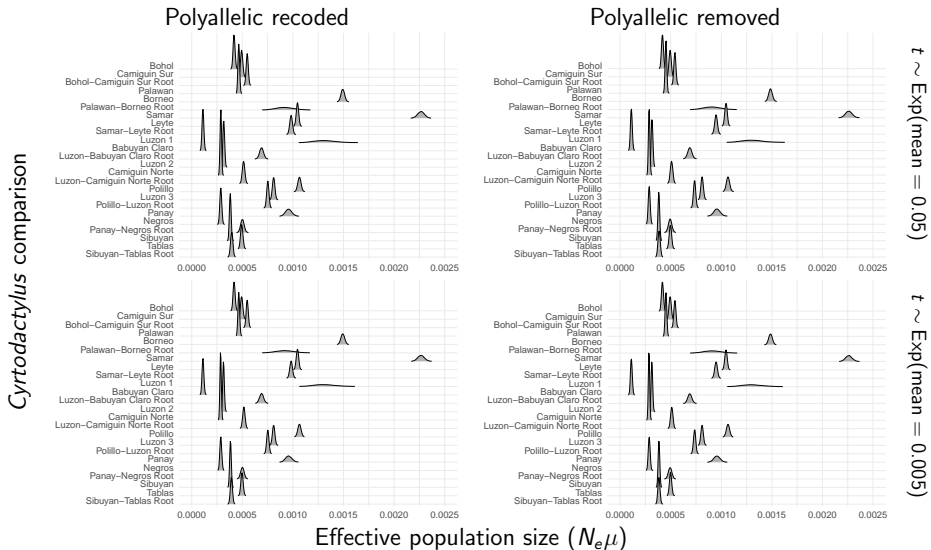

# Figure S9

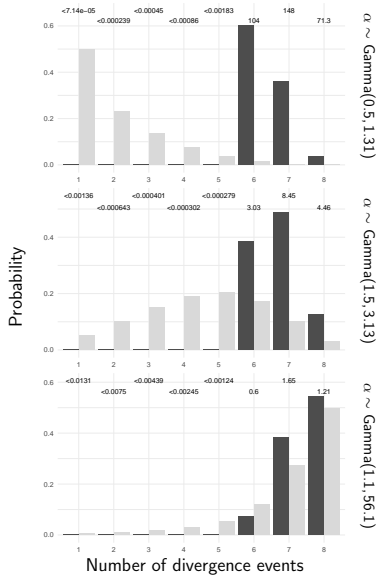

# Figure S10

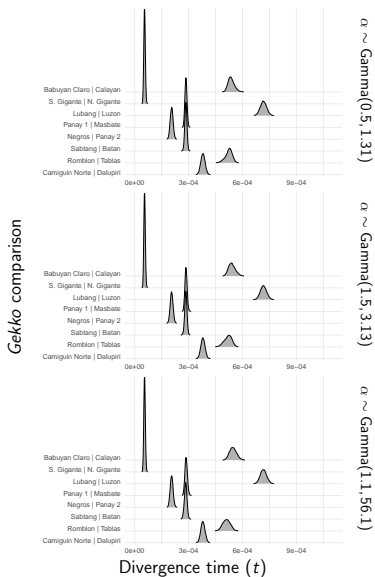



# Figure S11

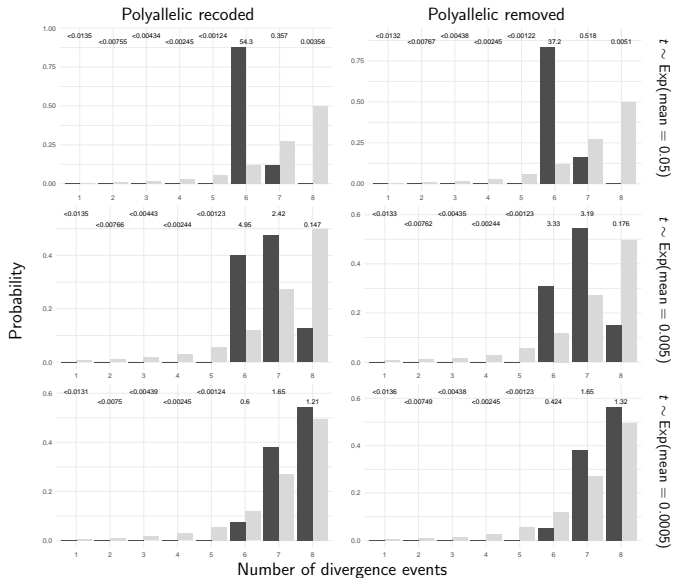

# Figure S12

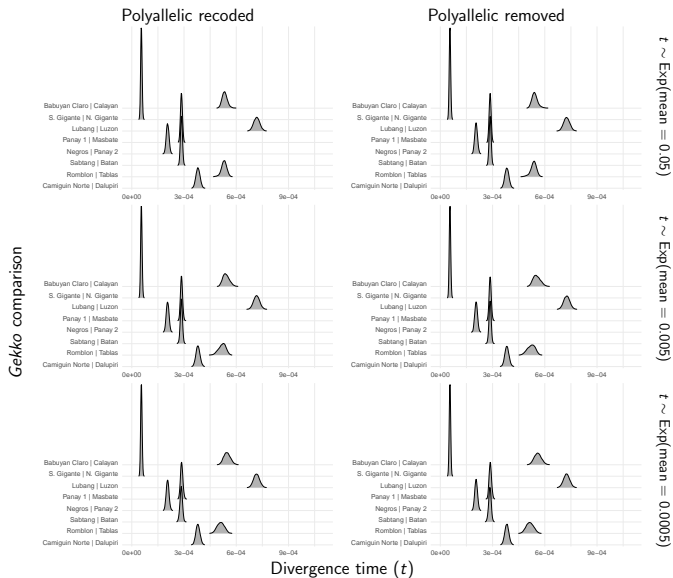

# Figure S13

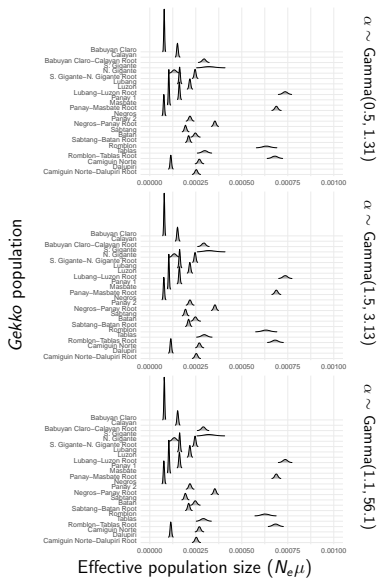

# Figure S14

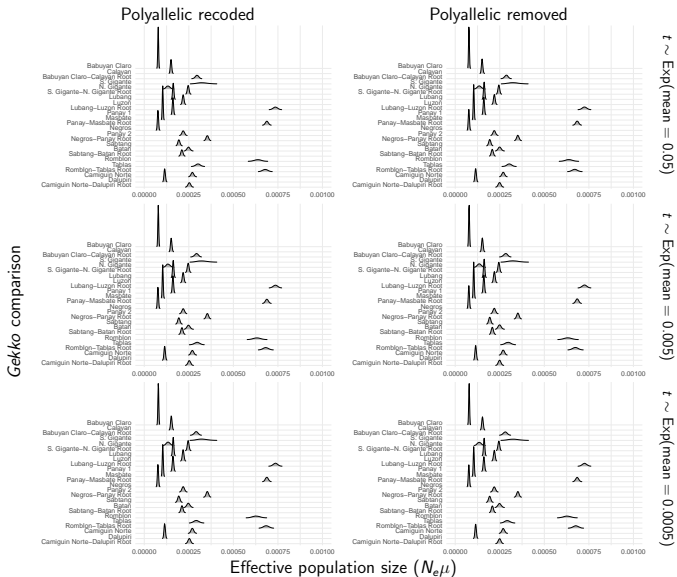

Figure S15

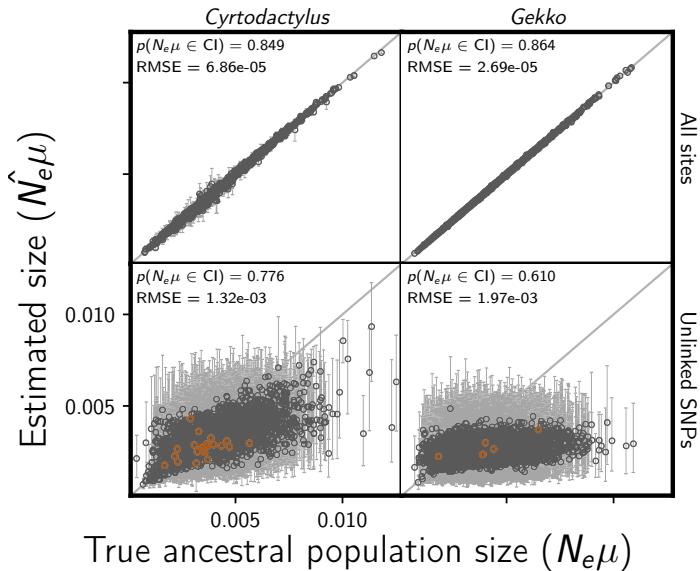

Figure S16

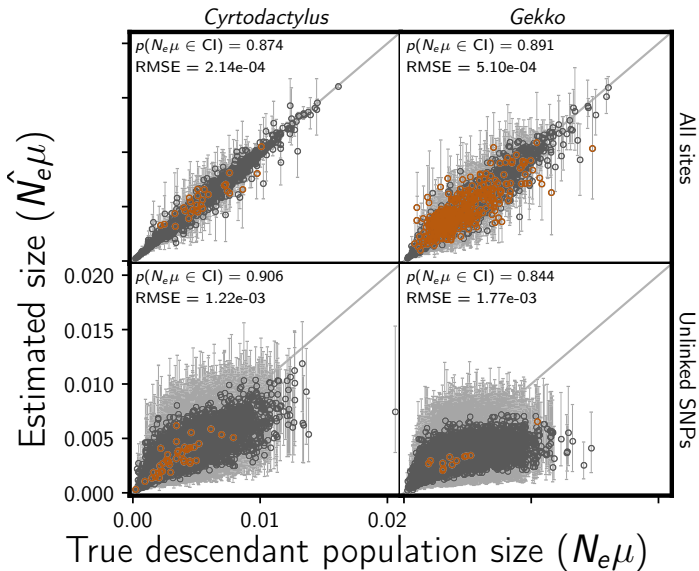

Figure S17

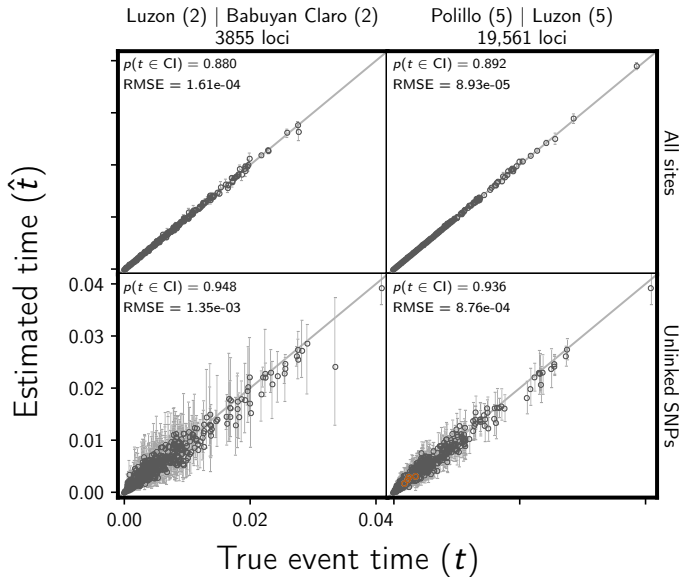

Supplement: EVO-73-1151-s002.pdf [file EVO-73-1151-s002.pdf]
